# Supplementary material for: Assembly of bicyclic or monocyclic clusters from [(η5-C5Me5)2Mo2(μ3-S)4(CuMeCN)2]2+ with tetraphosphine or N,P mixed ligands: syntheses, structures and enhanced third-order NLO performances
Source: Royal Society of Chemistry journal article supplement (doi:10.1039/c1dt10685f), 2011-01-01
Supplement: c1dt10685f.pdf [file c1dt10685f.pdf]

## Electronic Supplementary Information

### Assembly of bicyclic or monocyclic clusters from $[(\eta^5\text{-C}_5\text{Me}_5)_2\text{Mo}_2(\mu_3\text{-S})_4(\text{CuMeCN})_2]^{2+}$ with tetrphosphine or N,P mixed ligands: syntheses, structures and enhanced third-order NLO performances

Zhi-Gang Ren,<sup>a</sup> Sha Sun,<sup>a</sup> Min Dai,<sup>a</sup> Hui-Fang Wang,<sup>a</sup> Chun-Ning Lü,<sup>a</sup> Jian-Ping Lang<sup>\*a,b</sup> and Zhen-Rong Sun<sup>c</sup>

10

<sup>a</sup> Key Laboratory of Organic Synthesis of Jiangsu Province, College of Chemistry, Chemical Engineering and Materials Science, Soochow University, Suzhou 215123, P. R. China. Fax: 86-512-65880089; E-mail: [jplang@suda.edu.cn](mailto:jplang@suda.edu.cn)

<sup>b</sup> State Key Laboratory of Organometallic Chemistry, Shanghai Institute of Organic Chemistry, Chinese Academy of Sciences, Shanghai 200032, P. R. China

<sup>c</sup> Department of Physics, East China Normal University, Shanghai 200062, People's Republic of China

20

**Figure S1.** ESI MS data of **3**. (a) The full data ranging from  $m/z = 200-3200$ ; (b) tested (black) and simulated (gray) data at  $m/z = 811.9$ ; (c) tested (black) and simulated (gray) data at  $m/z = 584.0$  .....S3

**Figure S2.** The full data ESI MS data of **4** (a), **5** (b) and **6** (c) ranging from  $m/z = 200-3200$  in MeCN. ....S4

5

**Figure S3.** The DFWM signal of a  $1 \times 10^{-4}$  M MeCN solution for **1** (a), **4** (b), **5** (c) and **6** (d) with 50-fs laser and 1.5 mm cell. The black squares are experimental data, and the solid curve is the theoretical fit. ....S5

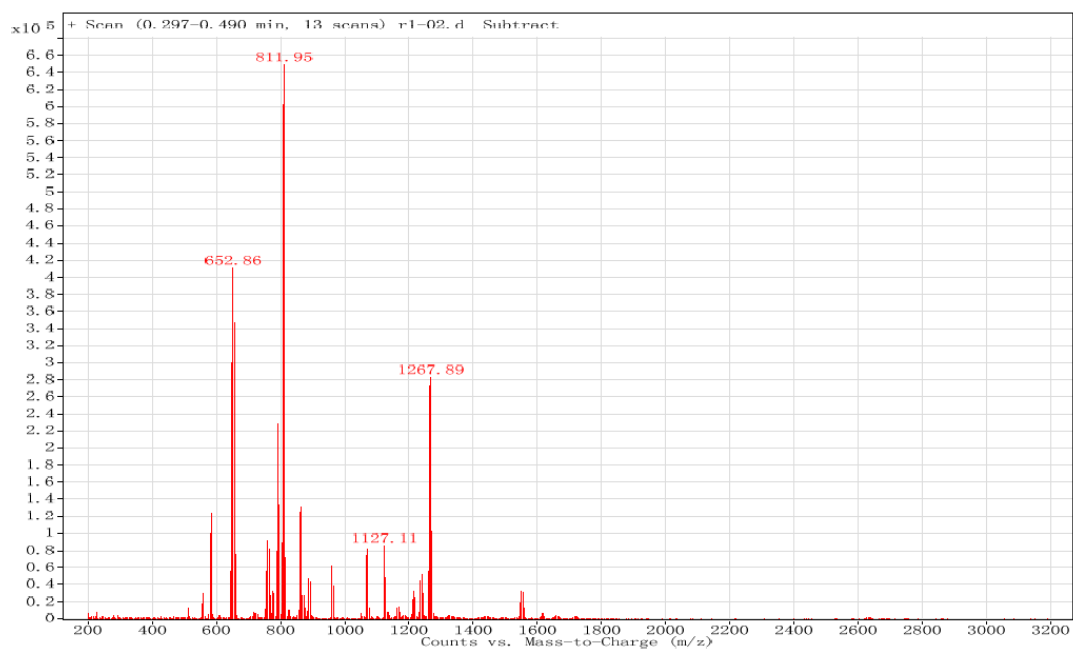

(a)

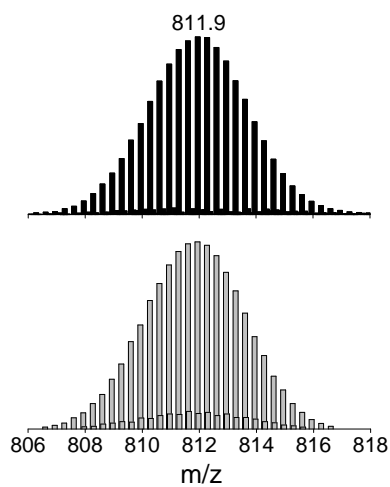

(b)

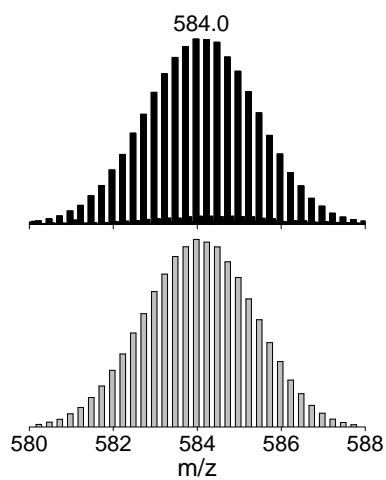

(c)

5  
**Figure S1.** ESI MS data of **3** in MeCN. (a) The full data ranging from  $m/z = 200$ - $3200$ ; (b) tested (black) and simulated (gray) data at  $m/z = 811.9$ ; (c) tested (black) and simulated (gray) data at  $m/z = 584.0$

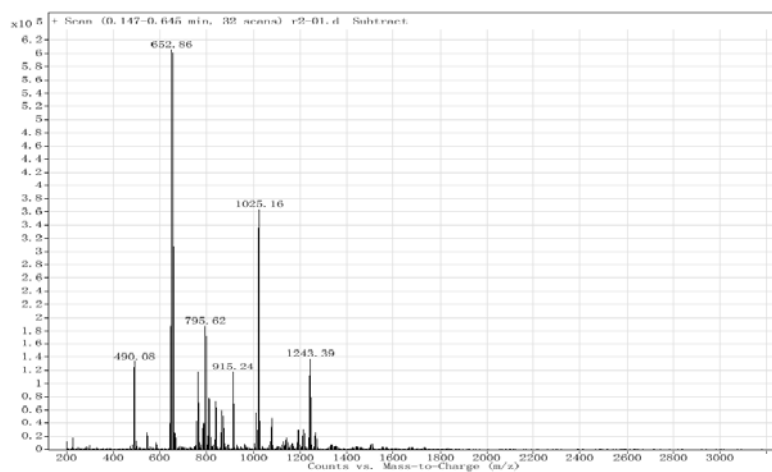

(a)

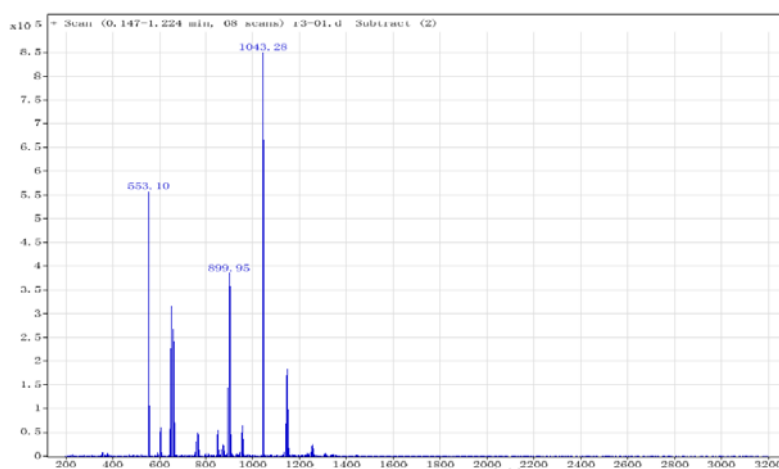

(b)

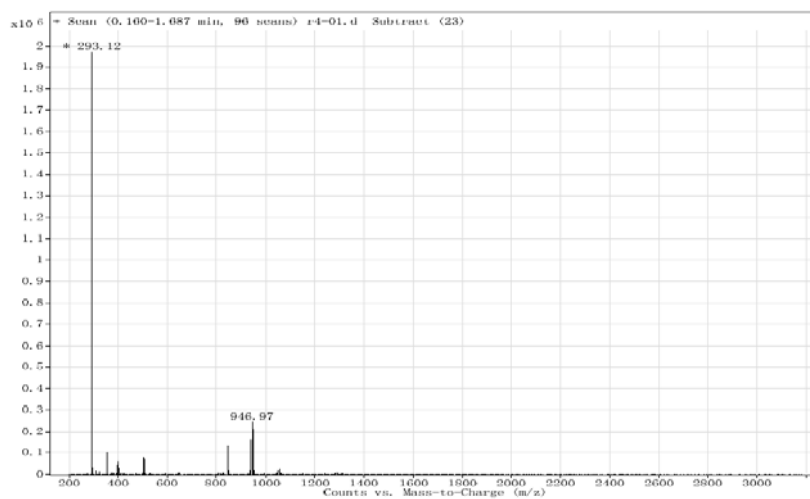

(c)

**Figure S2.** The full data ESI MS data of **4** (a), **5** (b) and **6** (c) ranging from  $m/z = 200-3200$  in MeCN.

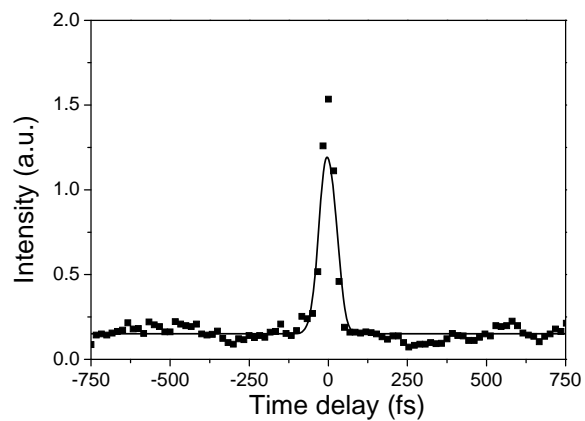

(a)

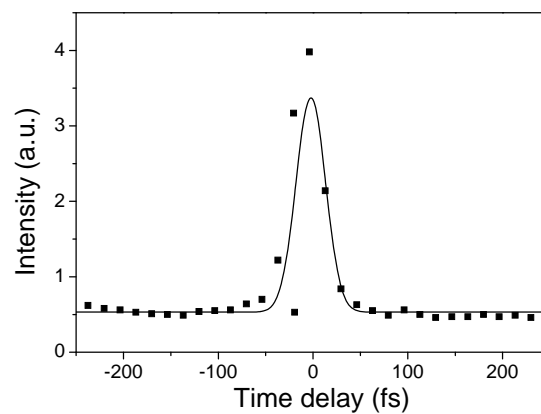

(b)

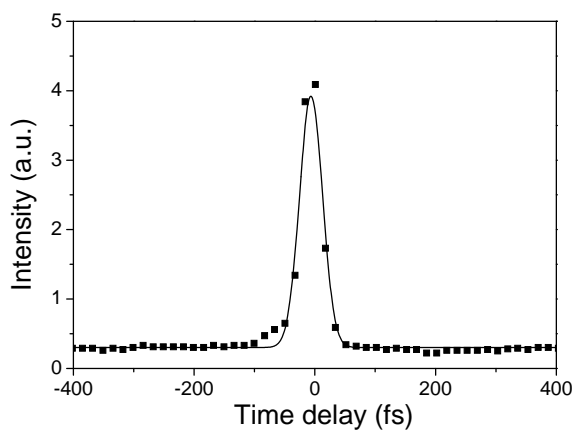

(c)

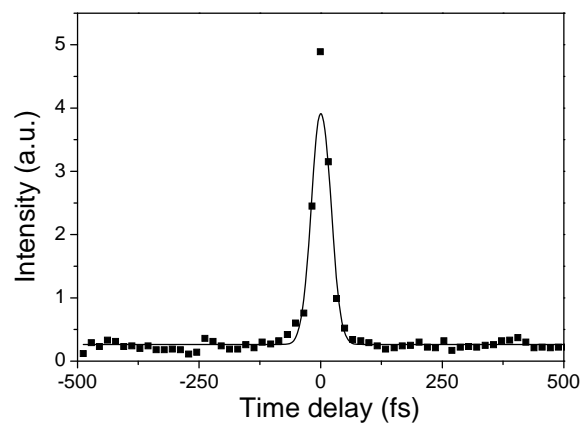

(d)

5

**Figure S3** The DFWM signal of a  $1 \times 10^{-4}$  M MeCN solution for **1** (a), **4** (b), **5** (c) and **6** (d) with 50-fs laser and 1.5 mm cell. The black squares are experimental data, and the solid curve is the theoretical fit.
